# Supplementary material for: Inhibition of Voltage-Gated Na+ Currents Exerted by KB-R7943 (2-[2-[4-(4-nitrobenzyloxy)phenyl]ethyl]isothiourea), an Inhibitor of Na+-Ca2+ Exchanging Process
Source: MDPI journal article supplement (doi:10.3390/ijms24021805), 2023-01-16
Supplement: s1 [file s1]

## Supplementary Information

### *Kinetic studies of KB-R7943-mediated inhibition of $I_{Na}$ measured from pituitary GH<sub>3</sub> cells*

To provide quantitative estimate for KB-R7643-induced block of  $I_{Na}$  activated in response to short depolarizing pulse, we further evaluated the time-dependent inactivation indicating the block of  $I_{Na}$  observed in these cells. We fitted the time courses of current inactivation during cell exposure to different concentrations of KB-R7943 by a two-exponential function, i.e., fast and slow inactivation time course of the current. The concentration dependence of  $I_{Na}$  inactivation elicited by abrupt depolarizing pulse from -100 to -10 mV was examined. The results showed that with the presence of KB-R7943, it produced a concentration-dependent raise in the rate ( $1/\tau_{inact(S)}$ ) of  $I_{Na}$  in response to rapid membrane depolarization.

The inhibitory action of KB-R7943 on the slow time course of  $I_{Na}$  inactivation measured from GH<sub>3</sub> cells is reasonably explained by state-dependent block that preferentially binds to the open/inactivated state of the Nav channel. A minimal kinetic scheme was hence derived as the following:

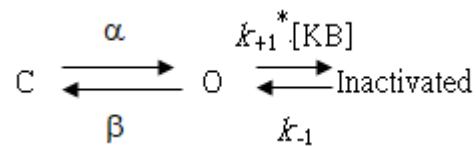

where [KB] is the KB-R7943 concentration applied;  $\alpha$  or  $\beta$  is the voltage rate constant for the opening or closing of Nav channels, respectively;  $k_{+1}^*$  or  $k_{-1}$  is the rate constant for blocking and unblocking produced by the presence of KB-R7943; and, C, O, or

Inactivated shown in the scheme points out the close, open, or inactivated state, respectively.

The blocking (i.e., on) and unblocking (i.e., off) rate constants,  $k_{+1}^*$  and  $k_{-1}$ , were determined from the slow component in inactivation time constants (i.e.,  $\tau_{inact(S)}$ ) of  $I_{Na}$  obtained in different concentrations of KB-R7943. These rate constants ( $1/\tau_{inact(S)}$ ) were then allowed to be computed using the relation (**Supplementary Figure 1**):

$$1/\tau_{inact(S)} = k_{+1}^* \times [KB] + k_{-1}$$

where  $k_{+1}^*$  and  $k_{-1}$  are respectively approximated from the slope and from the  $y$ -axis intercept at  $[KB] = 0$  of the linear regression where the reciprocal time constants ( $1/\tau_{inact(S)}$ ) versus the KB-R7943 concentrations were interpolated, and  $[KB]$  is the KB-R7943 concentration given.

According to the first-order binding scheme, the relationship between  $1/\tau_{inact(S)}$  and  $[KB]$  became linear (**Supplementary Figure 1**). The blocking and unblocking rate constants were estimated to be  $0.252 \text{ msec}^{-1}\text{ }\mu\text{M}^{-1}$  and  $0.245 \text{ msec}^{-1}$ , respectively; hence, the results yielded the value of dissociation constant ( $K_D = k_{-1}/k_{+1}^*$ ) of  $0.97 \text{ }\mu\text{M}$ . The value is noticeably close to effective  $IC_{50}$  required for KB-R7943-mediated decrease of  $I_{Na(L)}$  in GH<sub>3</sub> cells.

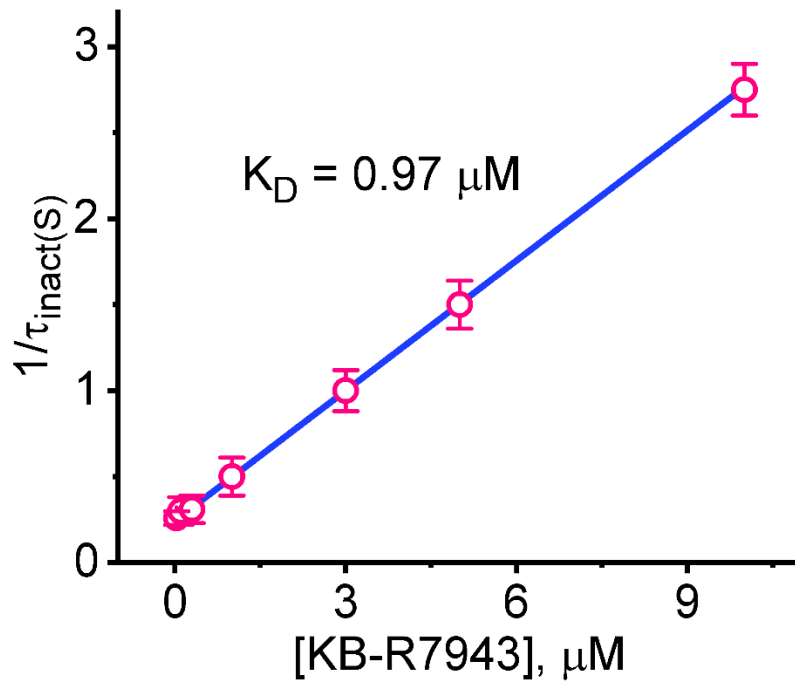

**Supplementary Figure S1.** Concentration-dependent raise of the rate constant ( $\tau_{inact}(S)$ ) of  $I_{Na}$  inactivation observed in GH<sub>3</sub> cells. The reciprocal of time constant (i.e.,  $1/\tau_{inact}(S)$ ) of current inactivation versus the KB-R7943 concentration is illustrated. Data points appearing in open red circles were fitted by a linear regression (blue line), reflecting that there is molecularity of one. Each point represents the mean  $\pm$  SEM ( $n = 8$ ).
